# Supplementary material for: Transcriptome Analysis Reveals the Hormone Signalling Coexpression Pathways Involved in Adventitious Root Formation in Populus
Source: MDPI journal article supplement (doi:10.3390/f14071436), 2023-07-13
Supplement: s1 [file s1]

**Table S3.** The primer sequences used in real-time quantitative PCR.

| Genes   | Gene ID        | Primer sequence F (5' to 3') | Primer sequence R (5' to 3') |
|---------|----------------|------------------------------|------------------------------|
| SAUR    | Pop_G05G017916 | GAAGCAGCTAATTCGCCGTCTC       | CCGTAAACCGCTCCATCTCAT        |
| GH3     | Pop_G02G024232 | TGGGCTGTATCGTTATCGTAT        | TAGGGTTCCAGTAATTTCTTCG       |
| B-ARR   | Pop_G09G014072 | TTGATTCCACCTGAACTTGCT        | GTCGTGCGTTTGACCTGTCGT        |
| DELLA   | Pop_G06G051534 | CAGTGCCATTGCCGTTTCAGA        | CTGCTGGTGTTGCTGTTGGATGT      |
| PYR/PYL | Pop_A16G090069 | ATGAGCGGCATGTCATTAGTT        | TCTTTAGTATTTCGCGAGGG         |
| ERF1/2  | Pop_A13G011470 | AAGAAGGACAGTCACCGATTT        | GGATAGCAGTTCCTCCAAATA        |
| TCH4    | Pop_A06G061600 | ATCAGCGCACGATGAAATAGA        | TCCACAGAAAGGACGATGCTA        |
| MYC2    | Pop_A18G035992 | TAGTTGGGAAATGAATCAGCA        | ACAGAAGCCTTATCCAGTTTG        |
| PR-1    | Pop_G01G067363 | GGAGATGAGTAAGATCGCCCTAG      | GCAACCGTCCCTTAGTCCATT        |
| UBQ     | BU879229       | GTTGATTTTGTGCTGGGAAGC        | GATCTTGGCCTTCACGTTGT         |
